# Supplementary material for: Dietary advanced glycation end-product consumption leads to mechanical stiffening of murine intervertebral discs
Source: PubMed Central journal article supplement (PMC6307905; doi:10.1242/dmm.036012), 2018-12-18
Supplement: dmm-11-036012-s1.pdf [file dmm-11-036012-s1.pdf]

Table S1. Experimental Groups

| <b>C57BL/6J mice</b> | <b>Low AGE Diet (L-AGE)<br/>7.6 µg/mg AGE</b> | <b>High AGE Diet (H-AGE)<br/>40.9 µg/mg AGE</b> |
|----------------------|-----------------------------------------------|-------------------------------------------------|
| Female               | n=10                                          | n=11                                            |
| Male                 | n=13                                          | n=10                                            |

Table S2. Primary Study Measurements

| <b>TISSUE</b>        | <b>TEST</b>                            | <b>MEASUREMENT</b>                                             |
|----------------------|----------------------------------------|----------------------------------------------------------------|
| Blood                | Serum ELISA                            | Blood glucose<br>AGE measurement                               |
| Caudal IVD           | Western Blot                           | AGE measurement                                                |
| Caudal IVD C4-<br>C5 | Mechanical Testing                     | Axial, Torsional and Failure<br>tests                          |
| Lumbar IVD L4-5      | Histology<br>(Picrosirius/Alcian blue) | DIC, polarized light & SHG<br>imaging<br>collagen denaturation |
